# Supplementary material
Source: publisher site journal article supplement (https://www.dovepress.com/article/211496)

## Supplementary Information

**Figure S1. Stability of PMAA-AuNPs in biological media.** (A) UV-vis spectra of PMAA-AuNPs in DMEM and DMEM + 10% FBS at Day 1 and Day 8. (B) SAXS diagrams of PMAA-AuNPs in water, DPBS, DMEM and DMEM + 10% FBS.

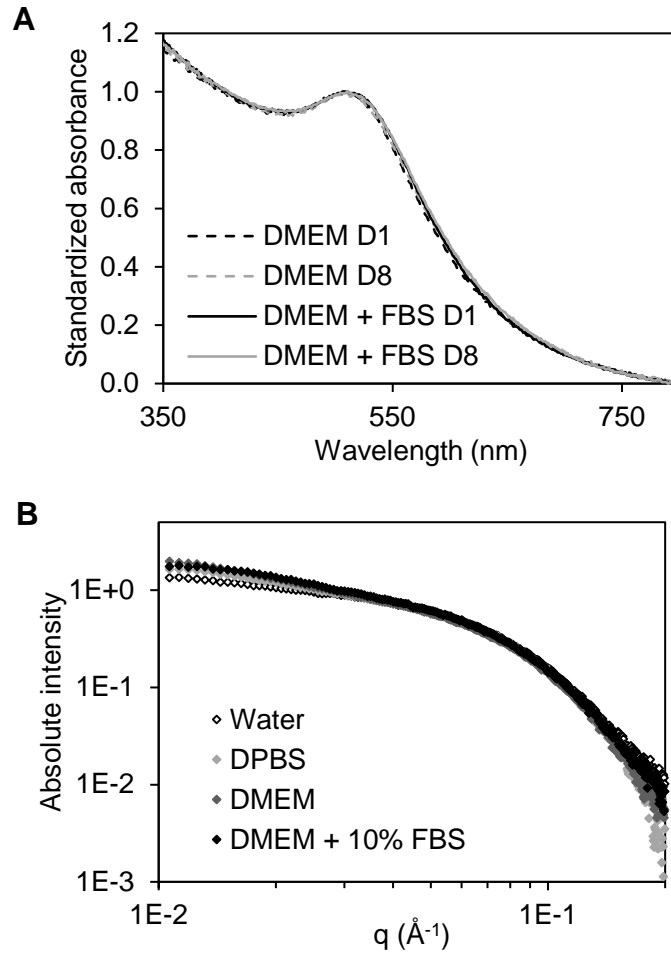

Supplement: Supplementary file 1 [file get_supplementary_file.php]
